# Supplementary material
Source: PubMed Central journal article supplement (PMC365782)
Supplement: pnas_101_9_3286__3.pdf [file pnas_101_9_3286__3.pdf]

**Table 3. Properties of the *GRP* genes and proteins**

| Gene | GRP | Species   | 5' elements* |    |     |    |   | Exon 1,<br>bp | Exon 2,<br>bp | pI <sup>†</sup> | Predominant amino acid , % content |
|------|-----|-----------|--------------|----|-----|----|---|---------------|---------------|-----------------|------------------------------------|
|      |     |           |              |    | III | IV |   |               |               |                 |                                    |
| 7510 | 14  | At        |              |    | III | IV |   | 251           | 331           | 12.2            | G(35), A(16), P(11)                |
|      |     | Aa1       | I            | II | III | IV | V | 251           | 445           | 12.3            | G(37), A(18), P(10)                |
|      |     | Aa2       |              | II | III | IV | V | 251           | 364           | 12.3            | G(40), A(16), P(9)                 |
|      |     | Op        |              |    |     | IV |   | 245           | 490           | 12.3            | G(32), A(17), P(14), L(14)         |
|      |     | Si        |              |    | III |    |   | 293           | 376           | 10.0            | G(25), A(18), P(11), S(10)         |
|      |     | Bo        |              |    | III | IV | V | 257           | 259           | 10.6            | G(22), A(18), P(13), S(10)         |
| 7520 | 18  | At        | I            | II | III | IV | V | 245           | 442           | 9.9             | G(27), A(26), P(12)                |
|      |     | Aa1       |              | II | III | IV |   | 248           | 436           | 9.7             | G(27), A(25), P(13)                |
|      |     | Aa2       | I            | II | III | IV | V | 243           | 447           | 9.9             | G(26), A(26), P(13)                |
|      |     | Op        |              |    | III | IV |   | 245           | 526           | 10.0            | A(29), G(16), P(13)                |
|      |     | Cr        |              |    | III | IV |   | 245           | 280           | 10.7            | G(22), A(16), P(13)                |
|      |     | Si        |              |    | III | IV |   | 323           | 385           | 10.1            | G(22), A(20)                       |
|      |     | Bo        |              |    | III | IV |   | 323           | 238           | 11.8            | A(26), G(15)                       |
| 7530 | 17  | At        | I            | II | III | IV | V | 419           | 1213          | 10.3            | G(34), S(18), K(18)                |
|      |     | Aa1       | I            |    | III | IV | V | 419           | 1147          | 10.3            | G(42), S(15), K(15)                |
|      |     | Aa2       | I            |    | III | IV | V |               | 1141          | 10.2            | G(41), S(15), K(15)                |
|      |     | Op        | I            | II |     | IV |   | 470           | 1003          | 10.4            | G(40), S(16), K(14)                |
|      |     | Cr        | I            | II | III | IV |   | 509           | 877           | 10.4            | G(30), S(23), K(17)                |
|      |     | Si        | I            |    | III | IV |   | 323           | 634           | 10.0            | G(26), S(21), K(13)                |
|      |     | Bo        | I            | II | III | IV |   | 733           | 353           | 9.0             | G(30), S(25)                       |
| 7540 | 16  | At        | I            | II | III | IV |   | 257           | 478           | 10.0            | G(39), A(14), P(12), S(10)         |
|      |     | Aa1       | I            | II | III | IV |   | 257           | 478           | 9.6             | G(35), A(12), P(12)                |
|      |     | Aa2       | I            | II | III | IV |   | 257           | 454           | 9.7             | G(35), A(14), P(11)                |
|      |     | Op        | I            |    | III | IV |   | 257           | 469           | 9.7             | G(41), A(16), P(14)                |
|      |     | Cr        | I            |    |     | IV |   | 257           | 817           | 10.3            | G(32), S(17), K(15), A(12)         |
|      |     | Si        | I            |    | III | IV |   | 257           | 364           | 9.8             | P(19), G(17), K(17), A(11)         |
|      |     | Bo        | I            |    | III | IV |   | 257           | 805           | 9.5             | P(19), G(17), K(17), A(12)         |
| 7550 | 19  | At        | I            | II | III | IV |   | 236           | 85            | 11.0            | P(22), G(15), A(11)                |
|      |     | Aa1       | I            | II | III | IV |   | 236           | 88            | 11.8            | P(21), G(14), A(14), R(11)         |
|      |     | Aa2       | I            | II | III | IV |   | 236           | 85            | 11.0            | P(22), G(15), A(11), S(11)         |
|      |     | Op        | I            | II | III | IV |   | 236           | 88            | 11.0            | P(29), A(18), T(11)                |
|      |     | Cr        | I            | II |     | IV |   | 236           | 76            | 10.5            | P(21), S(17), K(17), G(12)         |
|      |     | Si (7550) | I            |    | III | IV |   | 239           | 94            | 9.6             | P(20), K(20), G(13), A(10)         |
|      |     | Si (7555) | I            |    | III | IV |   | 236           | 85            | 9.4             | P(19), K(15), G(15), D(11)         |
|      |     | Bo        | I            |    | III | IV |   | 239           | 88            | 10.4            | P(18), G(21), K(14)                |
| 7560 | 20  | At        |              |    |     | IV |   | 317           | 145           | 10.3            | A(35), P(21), G(17), K(11)         |
|      |     | Aa1       |              |    |     | IV |   | 317           | 160           | 10.3            | A(31), P(20), G(20), K(11)         |
|      |     | Aa2       |              |    |     | IV |   | 317           | 139           | 10.2            | A(43), P(21), G(11), K(11)         |
|      |     | Op        |              |    |     | IV |   | 305           | 142           | 11.1            | A(33), G(22), P(17)                |
|      |     | Cr        |              |    |     | IV |   | 308           | 211           | 10.5            | A(29), G(20), K(17), P(12)         |

| Gene | GRP | Species | 5' elements* |    |     |    |   | Exon 1, | Exon 2, | pI <sup>†</sup> | Predominant amino acid , % content       |
|------|-----|---------|--------------|----|-----|----|---|---------|---------|-----------------|------------------------------------------|
|      |     |         | I            |    |     | IV |   | bp      | bp      |                 |                                          |
|      |     | Si      | I            |    |     | IV |   | 320     | 172     | 10.1            | A(32), P(23), K(19)                      |
| 7565 | 21  | At      | I            |    | III |    |   | 287     | 3295    | 9.1             | P(21), G(14), S(14), K(10), A(10)        |
|      |     | Aa1     | I            |    |     |    |   | 287     | 3820    | 10.2            | P(20), G(14), S(14), K(10), A(10)        |
|      |     | Aa2     | I            |    |     |    |   | 287     | 3784    | 10.3            | P(20), G(14), S(14), K(10), A(10)        |
|      |     | Op      | I            |    |     |    |   | 287     | 3523    | 10.5            | G(20), A(14), P(13), K(11), S(10)        |
|      |     | Cr      | I            |    |     |    |   | 287     | 256     | 9.9             | P(17), G(14), A(14), K(13), T(13), S(11) |
| 7600 | 22  | At      |              | II | III | IV | V | 245     | 448     | 10.4            | G(19), A(15), T(12), P(11), A(11)        |
|      |     | Aa1     |              | II | III | IV | V | 245     | 334     | 9.9             | A(23), G(23)                             |
|      |     | Aa2     |              | II | III | IV | V | 245     | 412     | 10.0            | A(24), G(23)                             |
|      |     | Cr      |              |    | III | IV | V | 245     | 304     | 9.9             | G(17), S(16), A(15), P(12)               |

\*Indicates the presence of at least one copy of the upstream elements defined previously (1).

<sup>†</sup>Isoelectric point (pI) was calculated by using the PROTPARAM TOOL (<http://us.expasy.org/tools/protparam.html>).

1. de Oliveira, D. E., Franco, L. O., Simoens, C., Seurinck, J., Coppieters, J., Botterman, J. & Van Montagu, M. (1993) *Plant J.* **3**, 495–507.<sup>?AU</sup>
