# Supplementary material
Source: PubMed Central journal article supplement (PMC365782)
Supplement: pnas_101_9_3286__4.pdf [file pnas_101_9_3286__4.pdf]

**Table 4. Repeat type and abundance in *GRP* genes**

| Repeat*                    | Species | Sequence <sup>†</sup>                                                                                                                  | Copy no. | % Identity | Overlapping repeats <sup>‡</sup> |
|----------------------------|---------|----------------------------------------------------------------------------------------------------------------------------------------|----------|------------|----------------------------------|
| <b><i>GRP14</i> (7510)</b> |         |                                                                                                                                        |          |            |                                  |
| I                          | At      | GGACGTAGGAGATTTGGG<br>G R R R F G                                                                                                      | 3.2      | 90         |                                  |
|                            | Aa1     | GGAGGTAGGAGATTTGGG<br>G G R R F G                                                                                                      | 3.2      | 94         |                                  |
|                            | Aa2     | GGAGGTAGGAGATTTGGG<br>G G R R F G                                                                                                      | 3.2      | 94         |                                  |
| II                         | At      | GGTGGAGGTTTACCTGGAGGACTTGGAGGATTAGGA<br>G G G L P G G L G G L G                                                                        | 2.4      | 94         | 15, 5.4, 70<br>9, 9.7, 67        |
|                            | Aa1     | GGGGGAGGTTTACCTGGAGGACTTGGAGGCCCTTGGGA<br>G G G L P G G L G G L G                                                                      | 3.2      | 94         | 9, 10.7, 69                      |
|                            | Aa2     | GGGGGAGGTTTACCTGGAGGACTTGGAGGCCCTTGGGA<br>G G G L P G G L G G L G                                                                      | 3.1      | 94         | 9, 10.7, 69                      |
|                            | Op      | GGAGGTCTACCTGGAGCCGCAGGT<br>G G L P G A A G                                                                                            | 6.0      | 91         | 12, 5.3, 64                      |
| III                        | At      | GAAACTGCACCTGCCGCT<br>E T A P A A                                                                                                      | 2.8      | 87         |                                  |
|                            | Aa1     | GGAGCTGCACCAGCCGCT<br>G A A P A A                                                                                                      | 6.2      | 90         | 6, 17.2, 58                      |
|                            | Aa2     | GGAGCTGCACCTGCCGCT<br>G A A P A A                                                                                                      | 4.2      | 84         |                                  |
|                            | Op      | CCACCTGCTGCTGGAGCTGCTACACCACCTGCGCCTGGAGC<br>TAGT<br>P P A A G A A T P P A P G A<br><br>S                                              | 2.9      | 82         | 21, 6.0, 71                      |
|                            | Si      | GGAGGAGCTTACCCGCAGGAGGAGCTGCACCAGCG<br>G G A S P A G G A A P A                                                                         | 3.2      | 92         | 18, 6.3, 80                      |
|                            | Bo      | GCACCTGCACCCGCG<br>A P A P A                                                                                                           | 2.3      | 100        |                                  |
| <b><i>GRP18</i> (7520)</b> |         |                                                                                                                                        |          |            |                                  |
| I                          | Aa1     | GGTGGAGGTGCACCTGGAGGGGGCGGAAATCCATTTGCAAA<br>CATCTCAAAATGGTTCGGACCAGGGGCCGCA<br>G G G A P G G G G N P F A N<br><br>I S K W F G P G A A | 2.2      | 93         |                                  |
|                            | Aa2     | GGTGGAGGTGCACCAGGAGGGGGCGGAAATCCATTTGCAAA<br>CATCTCAAAATGGTTCGGACCAGGGGCCGCA<br>G G G A P G G G G N P F A N                            | 2.2      | 90         |                                  |

| Repeat*             | Species | Sequence <sup>†</sup>                                                                                                            | Copy no. | % Identity | Overlapping repeats <sup>‡</sup>                        |
|---------------------|---------|----------------------------------------------------------------------------------------------------------------------------------|----------|------------|---------------------------------------------------------|
|                     |         | I S K W F G P G A A                                                                                                              |          |            |                                                         |
| II                  | At      | GCCGCTGGAGCTGCGCCT<br>A A G A A P                                                                                                | 9.2      | 89         | First 2 copies interrupted with 63 bp                   |
|                     | Aa1     | GCCGCTGGAGCTGCACCA<br>A A G A A P                                                                                                | 10.0     | 87         | First 3 copies interrupted with the same 51-bp sequence |
|                     | Aa2     | GCCGCTGGAGCTGCACCT<br>A A G A A P                                                                                                | 10.0     | 90         | First 3 copies interrupted with the same 51-bp sequence |
|                     | Op      | CCTGCGGCTGGAGCTGCTACACCACCTGCGGCTGGAGCTAG<br>TGCA<br>P A A G A A T P P A A G A S<br><br>A                                        | 3.8      | 88         | 21, 11.8, 68                                            |
|                     | Cr      | GCGGCCGGAGCTGCTAACCT<br>A A G A A K P                                                                                            | 2.6      | 82         |                                                         |
|                     | Si      | GCGGGTGGAGCTGAACCA<br>A G G A E P                                                                                                | 6.4      | 84         |                                                         |
|                     | Bo      | GCAGCACCAGCAGCTGAA<br>A A P A A E                                                                                                | 1.91     | 88         | 18, 4.1, 79 overlaps                                    |
| <b>GRP17 (7530)</b> |         |                                                                                                                                  |          |            |                                                         |
| ExonI               | Op      | CAAAAACCATCATCGGCTCAGTCTCTGTCA<br>Q K P S S A Q S L S                                                                            | 3.1      | 95         | Before oleosin domain                                   |
|                     | Cr      | CAAAAACCATCATCAGCTCAGTCTCTGTCAATGAGAGAGGG<br>CAGAAAGTTTCCTTTTCTGTCTCTCCA<br>Q N P S S A Q S L S M R E G<br><br>R K F P F L S L P | 2.4      | 93         | Before oleosin domain                                   |
| I                   | At      | GGAGGTAAAAAAGTAAATTC<br>G G K K S K F                                                                                            | 3.1      | 67         |                                                         |
|                     | Aa1     | GGAGGTAAATCCAAAAGTCGA<br>G G K S K S R                                                                                           | 2.9      | 79         |                                                         |
|                     | Aa2     | GGTAAATTCGGAGGTAAAAAGGCAAGTCCGAAGGTGAAGA<br>A<br>G K F G G K K G K S E G E E                                                     | 2.1      | 79         |                                                         |
|                     | Cr      | TCTCTGCCACAAAAACAATCATCAGCTCAG<br>S L P Q K Q S S A Q                                                                            | 1.9      | 85         |                                                         |
|                     | Bo      | ATACCGGAGAGTATTAACCAAGTAATATT<br>I P E S I K P S N I                                                                             | 4.0      | 97         | 15, 7.2, 66                                             |

| Repeat* | Species    | Sequence <sup>†</sup>                                                                                                                                                                                                                                                                                        | Copy no. | % Identity | Overlapping repeats <sup>‡</sup>                                                                |
|---------|------------|--------------------------------------------------------------------------------------------------------------------------------------------------------------------------------------------------------------------------------------------------------------------------------------------------------------|----------|------------|-------------------------------------------------------------------------------------------------|
|         | Bo         | AAACACGGAAGTGGAGGT<br>K H G S G G                                                                                                                                                                                                                                                                            | 17.5     | 68         | 21, 2, 81<br>21, 4.7, 83                                                                        |
| II      | At<br>(a)  | GAAGGTATGTCTGGAAGTGAAGGAGGTATGTCCGGAGGTGG<br>AGGAAGTAAATCCAAAAGTAAAAAAGTAAACTCAAAGCTA<br>AATTGGGAAAGAAAAAGGTATGTCCGGAGGCATGTCAGGA<br>AGTGAA<br>E G M S G S E G G M S G G G<br><br>G S K S K S K K S K L K A<br>K L G K K K G M S G G M S G<br><br>S E                                                        | 4.3      | 93         | 21, 3.1, 67<br>21, 4.8, 72<br>42, 2.9, 67<br>21, 2, 95<br>21, 2.4, 90                           |
|         | At (b)     | GGCATGTCAGGAAGTGAAGGAGGTATGTCTCGAAGTGAAGG<br>AAGTATATCCGGAGGTGGTATGTCTGGGGCAGCGGAAGTA<br>AACACAAAATTGGAGGAGGTAAACACGGAGGTCTTAGAGGT<br>AAATTCGGAAGAAAAGAGGCATGTCAGGAAGTGAAGGA<br>G M S G S E G G M S R S E G<br><br>S I S G G G M S G G S G S<br>K H K I G G G K H G G L R G<br><br>K F G K K R G M S G S E G | 2.2      | 93         | Overlaps with<br>previous repeat by 60<br>bp<br>21, 23.9, 60 (spans a<br>and b)<br>141, 2.1, 80 |
|         | Aa1        | GGAGGTAAATCCAAAAGAGAGGAGGTAAACTCGGAGGTCT<br>TCGAGATAAATACGGAAAGAAAGGAGGTAAAGTCCGGAGGTG<br>GAGGAGGCATGTCAGGAAGTGAAGGAGCTATGTCTGGAAGT<br>GAAGGAGGTATGTCC<br>G G K S K K R G G K L G G L<br><br>R D K Y G K K G G K S G G<br>G G G M S G S E G A M S G S<br><br>E G G M S                                       | 2.0      | 90         | 21, 9, 65<br>42, 4.7, 66<br>15, 4.2, 93<br>21, 13, 63 (spans II<br>and III)                     |
|         | Aa2<br>(a) | TCCGAAGGTGAAGAAGGTAGTCGTCTGGGGAAGAAGGTATG<br>TCCGGAGGTGAAGGAGGTAAATCCAAAAGGGAGGGAGTAA<br>ATCTAAAAGTCGACGAGATAAATCAAAAAGTAAAAAGGCA<br>TGTCCGGAGGG<br>S E G E E G M S S G E E G M<br><br>S G G E G G K S K K G G S<br>K S K S R R D K S K S K K G<br><br>M S G G E                                             | 2        | 76         | Partial gene, exon 1<br>is interrupted<br>21, 2.9, 74<br>21, 9.3, 63 (spans a<br>and b)         |

| Repeat* | Species    | Sequence <sup>†</sup>                                                                                                                                                                                                                                                   | Copy no. | % Identity | Overlapping repeats <sup>‡</sup>                                                         |
|---------|------------|-------------------------------------------------------------------------------------------------------------------------------------------------------------------------------------------------------------------------------------------------------------------------|----------|------------|------------------------------------------------------------------------------------------|
|         | Aa2<br>(b) | GGAGGTAAATCCAAAAAGAGAGGAGGTAAACTCGGAGGTCT<br>TTCGAGATAAATACGGAAAGAAAGGAGGCAAGTCCGGAGGTG<br>GAGGAGGCATGTCAAGAAGTGAAGGAGCTATGTCTGGAAGT<br>GAAGGAGGTATGTCC<br>G G K S K K R G G K L G G L<br><br>R D K Y G K K G G K S G G<br>G G G M S R S E G A M S G S<br><br>E G G M S | 2.0      | 88         |                                                                                          |
|         | Op         | GGAGGTATGTCTGGAAGGAAGGAGGTATGTCTCAGGAGGTGGA<br>GGAGGTAAATCCAAAGGTGGACATAAATCCAGAGGTCTAA<br>GAGGTAAGTCCAAAAGTAAAAAAGGTATGTCCGGAAGCGAA<br><br>G G M S G R K E V C Q E V E<br><br>E V N P K V G H K S R G L<br>R G K S K S K K G M S G S E                                 | 2.4      | 85         | 21, 34.8, 67<br>15, 3.2, 84                                                              |
|         | Op         | GGTATGTCTGGAAGCGAAGGAGGTATGTCTGGAAGCGAAGG<br>AGGTAAACACGGAGGCGGAGGAGGTAAACACGGAGGTAAAC<br>ATGGAGGTGGA<br>G M S G S E G G M S G S E G<br><br>G K H G G G G G K H G G K<br>H G G G                                                                                        | 2.1      | 89         | Overlaps with a by<br>69 bp<br>12, 2.5, 94<br>21, 7.4, 76<br>12, 2.5, 100<br>33, 2.9, 65 |
| III     | Aa1        | GGTGGTATGTCCGGA<br>G G M S G                                                                                                                                                                                                                                            | 2.4      | 85         |                                                                                          |
|         | Aa1        | GGAGGTATGTCCGAGGTGGA<br>G G M S G G G                                                                                                                                                                                                                                   | 5.8      | 78         | 15, 1.9, 92                                                                              |
|         | Aa2        | GGAGGTATGTCCGGAAGTGAA<br>G G M S G S A                                                                                                                                                                                                                                  | 13       | 66         | 15, 3.3, 97                                                                              |
|         | Aa2        | GGTGGTATGTCCGGA<br>G G M S G                                                                                                                                                                                                                                            | 2.4      | 85         |                                                                                          |
|         | Aa2        | GGAGGTATGTCCGAGGTGGA<br>G G M S G G G                                                                                                                                                                                                                                   | 5.8      | 78         | 15, 1.9, 92                                                                              |
|         | Cr         | GGAGGTATGTCCGGAAGTGAA<br>G G M S G S A                                                                                                                                                                                                                                  | 21.2     | 67         | 12, 3.1, 100<br>15, 4.7, 92<br>24, 2.3, 96<br>15, 6.7, 79                                |
| IV      | At         | GGTAAACACAAAATCGGAGGA<br>G K H K I G G                                                                                                                                                                                                                                  | 2.7      | 91         |                                                                                          |
|         | Aa1        | GGTAAACACAAAATCGGAGGA<br>G K H K I G G                                                                                                                                                                                                                                  | 2.7      | 94         |                                                                                          |

| Repeat*             | Species | Sequence <sup>†</sup>                                                                                                        | Copy no. | % Identity | Overlapping repeats <sup>‡</sup>           |
|---------------------|---------|------------------------------------------------------------------------------------------------------------------------------|----------|------------|--------------------------------------------|
|                     | Aa2     | GGTAAACACAAAATCGGAGGA<br>G K H K I G G                                                                                       | 2.7      | 94         |                                            |
|                     | Si      | GGAAAAAATCCAAAAGT<br>G K K S K S                                                                                             | 2.2      | 86         |                                            |
|                     | Si      | TCTATGGGTGGAGGTAAACATGGAAGTGAAGTTCA<br>S M G G G K H G S G S S                                                               | 7.2      | 70         | 18, 8.7, 66<br>18, 12.9, 60                |
|                     | Bo      | GGTGGAGGTAAACACGGAAGCGGAGGTAAACATGGAAGTGG<br>AGGTTCTGCTATG<br>G G G K H G S G G K H G S G<br><br>G S S M                     | 4.9      | 79         |                                            |
| V                   | Bo      | AGTTCAGATGGA<br>S S D G                                                                                                      | 5.3      | 86         | 27, 2.7, 82                                |
| <b>GRP16 (7540)</b> |         |                                                                                                                              |          |            |                                            |
| I                   | At      | GGAGGAGCGTCG<br>G G A S                                                                                                      | 15.5     | 81         | 42, 2.1, 82<br>24, 11.8, 75<br>36, 7.1, 75 |
|                     | Aa1     | GAAGGAGCGTCTGGAGATAAACCGGGAGGAATGTCAGGAGC<br>GGGAGGAGCGTCAGGAGATAAACCA<br>E G A S G D K P G G M S G A<br><br>G G A S G D K P | 2.6      | 92         | 24, 10.8, 71<br>18, 2, 83<br>18, 2, 88     |
|                     | Aa2     | GGAGGAGCGTCTGGAGATAAACCGGGAGGAATGTCAGGAGC<br>GGGAGGAGCGTCGGGAGATAAACCA<br>G G A S G D K P G G M S G A<br><br>G G A S G D K P | 2.6      | 95         | 24, 9.8, 72<br>12, 12.5, 64                |
|                     | Op      | GATAAACCGGGAGGAGCGTCGGGA<br>D K P G G A S G                                                                                  | 3.0      | 78         | 48, 6, 76 (spans I and II)                 |
|                     | Cr      | GGAGCATCGGGAGGAGCGTCAAGTGGAGCGTCATCAGGAAC<br>ATCGGGTGAAGCGTCATCA<br>G A S G G A S S G A S S G T<br><br>S G E A S S           | 4.8      | 78         | 12, 23.8, 64<br>36, 9.2, 71                |
|                     | Si      | GATAAACCGACAAAAATGCCAGCAGATAAACCGACTGGAGG<br>GCCAAAA<br>D K P T K M P A D K P T G G<br><br>P K                               | 4.1      | 85         | 12, 3.8, 72<br>24, 3.5, 75                 |
|                     | Bo      |                                                                                                                              | 3.1      | 77         | 36, 6.3, 76                                |

| Repeat*             | Species | Sequence†                                                                                                                               | Copy no. | % Identity | Overlapping repeats‡                                            |
|---------------------|---------|-----------------------------------------------------------------------------------------------------------------------------------------|----------|------------|-----------------------------------------------------------------|
|                     |         | GGAGGAGCAGCAGATAAACCCAAAAGATAAATCCGCTGGAGG<br>AGCAACAGATAAGCCAGGAAGTAAACCAGCT<br>G G A A D K P K D K S A G G<br><br>A T D K P G S K P A |          |            | 24, 3.5, 70                                                     |
| II                  | At      | GGGGGAGCATCGGGAGATAAACCG<br>G G A S G D K P                                                                                             | 5        | 66         |                                                                 |
|                     | Aa1     | GGAGGAGCGTCGGGAGGAGCGCCT<br>G G A S G G A P                                                                                             | 4.2      | 81         | 12, 9.7, 59<br>36, 2.8, 74<br>36, 4.2, 67 (spans II<br>and III) |
|                     | Op      | GGAGCGCCGGGAGGAGCGTCAGGAGGAGCAGGAGCACCGGG<br>G<br>G A P G G A S G G A G A P G                                                           | 4.7      | 78         | 12, 23.9, 61<br>42, 5, 82 (extends<br>beyond)<br>24, 12.2, 62   |
|                     | Cr      | AAATCTGGAGGAACGAAGGGTGATAAATCCGGAGGAGCAAA<br>GGGAGAT<br>K S G G T K G D K S G G A K<br><br>G D                                          | 7.1      | 73         | 24, 14.9, 69<br>72, 4.6, 68                                     |
|                     | Si      | GGAGATAAACCGGTTGGAGGGTCAACAGATAAGCTA<br>G D K P V G G S T D K                                                                           | 2.9      | 86         |                                                                 |
|                     | Bo      | GATAAACCCGCTGGTGGACCAACAGATAAGCCAGAAAAGTAA<br>ACCAGCTGGAGAGGCATCAAATAAACCAAAA<br>D K P A G G P T D K P E S K<br><br>P A G E A S N K P K | 5.4      | 88         | 36, 11.1, 70<br>12, 4.7, 68                                     |
| III                 | Aa1     | GGAGCGCGAGGAGATAAACCCGAGGAAACACCAGGACATAA<br>ACCGGCG<br>G A R G D K P E E T P G H K<br><br>P A                                          | 2.4      | 74         | 24, 4.9, 76                                                     |
|                     | Aa2     | GGAGCCCGAGGAGATAAACTCGGAGGAACACCAGGACATAA<br>ACACGGG<br>G A R G D K L G G T P G H K<br><br>H G                                          | 2.5      | 74         | 24, 4.9, 77<br>36, 4.2, 69                                      |
|                     | Bo      | AAACCGACCGGAGGGACAGAAAAT<br>K P T G G T E N                                                                                             | 3.6      | 66         |                                                                 |
| <b>GRP19 (7550)</b> |         |                                                                                                                                         |          |            |                                                                 |
|                     |         | No conserved repeats detected                                                                                                           |          |            |                                                                 |

| Repeat*             | Species | Sequence†                                                                                                                                                                                                                                                                                                                                                                                                                                                                                                                                                                                                                                | Copy no. | % Identity | Overlapping repeats‡                                                                                                                                                                 |
|---------------------|---------|------------------------------------------------------------------------------------------------------------------------------------------------------------------------------------------------------------------------------------------------------------------------------------------------------------------------------------------------------------------------------------------------------------------------------------------------------------------------------------------------------------------------------------------------------------------------------------------------------------------------------------------|----------|------------|--------------------------------------------------------------------------------------------------------------------------------------------------------------------------------------|
| <b>GRP20 (7560)</b> |         |                                                                                                                                                                                                                                                                                                                                                                                                                                                                                                                                                                                                                                          |          |            |                                                                                                                                                                                      |
| I                   | At      | CCAGCAGCTAAA<br>P A A K                                                                                                                                                                                                                                                                                                                                                                                                                                                                                                                                                                                                                  | 2.7      | 100        |                                                                                                                                                                                      |
|                     | Aa1     | GCTGCCCCA<br>A A P                                                                                                                                                                                                                                                                                                                                                                                                                                                                                                                                                                                                                       | 4.3      | 76         |                                                                                                                                                                                      |
|                     | Aa1     | CCAGCAGCTAAA<br>P A A K                                                                                                                                                                                                                                                                                                                                                                                                                                                                                                                                                                                                                  | 4.2      | 89         |                                                                                                                                                                                      |
|                     | Aa2     | CCAGCAGCTAAA<br>P A A K                                                                                                                                                                                                                                                                                                                                                                                                                                                                                                                                                                                                                  | 3.2      | 92         |                                                                                                                                                                                      |
|                     | Op      | GGAGGTGGAGCTGCCCCAGCA<br>G G G A A P A                                                                                                                                                                                                                                                                                                                                                                                                                                                                                                                                                                                                   | 2.8      | 80         |                                                                                                                                                                                      |
|                     | Cr      | GGAGTGCATCAGGT<br>G A A S G                                                                                                                                                                                                                                                                                                                                                                                                                                                                                                                                                                                                              | 2.4      | 100        |                                                                                                                                                                                      |
|                     | Cr      | CCGGCAGCTAAAAA<br>P A A K K                                                                                                                                                                                                                                                                                                                                                                                                                                                                                                                                                                                                              | 4.6      | 87         |                                                                                                                                                                                      |
|                     | Si      | GCAAAACCAGCAGCCAAACAAGCAGCCAAACCTGCA<br>A K P A A K Q A A K P A                                                                                                                                                                                                                                                                                                                                                                                                                                                                                                                                                                          | 1.9      | 76         | 12, 4.8, 86                                                                                                                                                                          |
| <b>GRP21 (7565)</b> |         |                                                                                                                                                                                                                                                                                                                                                                                                                                                                                                                                                                                                                                          |          |            |                                                                                                                                                                                      |
| I                   | At      | GATGCACCTTCACCA<br>D A P S P                                                                                                                                                                                                                                                                                                                                                                                                                                                                                                                                                                                                             | 8.3      | 62         |                                                                                                                                                                                      |
|                     | At      | GGACCTCCATCAGATGCACCTACATCAGGT<br>G P P S D A P T S G                                                                                                                                                                                                                                                                                                                                                                                                                                                                                                                                                                                    | 6.1      | 62         |                                                                                                                                                                                      |
|                     | At      | TCAGGTGGACCTCCA<br>S G G P P                                                                                                                                                                                                                                                                                                                                                                                                                                                                                                                                                                                                             | 15.9     | 64         |                                                                                                                                                                                      |
|                     | At      | GGACTTATACCGAGACTTCCTGCACCAAGTGGGCCTGCATC<br>GAGTGGACCTTCACCAGGTGGAGATGCAATGACTGGACCAA<br>CACCGGAGGACCAACACCGAGTGGACTTACACCAGATGGA<br>CATTACCTACTGGAGATATATCAAGTGGAAATTTCCAGG<br>TGGATCTCCATCGAATGCACCTTCACCAGGTGGATCTATGA<br>TTGATGGACTTATACCAAATGGGCCTACATCGGGTGGACCT<br>CCATCAGATGCACCTTCATCAAGTGGACCTCAATAGATGT<br>ACCTGCAACGGGCAATCAATACTGGATGGACTTATACCAA<br>AAGGACTTATACCGAGACGACGAATATTGAGA<br>G L I P R L P A P S G P A S<br><br>S G P S P G G D A M T G P<br>T P G G P T P S G L T P D G<br><br>H L P T G D I S S G N F P G<br><br>G S P S N A P S P G G S M<br>I D G L I P N G P T S G G P<br><br>P S D A P S S S G P P I D V | 3.1      | 95         | 5, 7.2, 64<br>30, 3.5, 66<br>15, 3.3, 72<br>15, 4, 73<br>15, 3, 83<br>15, 3.3, 77<br>30, 2.1, 85<br>15, 4, 73<br>15, 6.2, 64<br>15, 3.3, 77<br>30, 2.4, 83<br>15, 4, 70<br>15, 8, 64 |

| Repeat* | Species | Sequence†                                                                                                         | Copy no. | % Identity | Overlapping repeats‡                                 |
|---------|---------|-------------------------------------------------------------------------------------------------------------------|----------|------------|------------------------------------------------------|
|         |         | P A T G K S I L D G L I P<br>K G L I P R R R I L R                                                                |          |            |                                                      |
|         | At      | CCGAAAGGACTTATA<br>P K G L I                                                                                      | 4.6      | 78         |                                                      |
|         | At      | CCAAGTGGACCTTCACCTGGTGGAGATAAATCAGGTGGTAC<br>TTCA<br>P S G P S P G G D K S G G T<br><br>S                         | 2.4      | 71         |                                                      |
|         | At      | GGACTTATACCGAGA<br>G L I P R                                                                                      | 5.4      | 71         |                                                      |
|         | Aa1     | CCAGGTGAAGATGCATCAAATGGAGCTTCCCAAGTGAAGA<br>TACAACAAGTGGAGCTACA<br>P G E D A S N G A F P S E D<br><br>T T S G A T | 2.3      | 75         | 15, 3.6, 70<br>30, 3.3, 70                           |
|         | Aa1     | GCATCGGGTGGACCTCCATCAGATGCATCT<br>A S G G P P S D A S                                                             | 10.4     | 68         | 15, 2.3, 85<br>15, 4.3, 65<br>45, 7, 62              |
|         | Aa1     | GGTGGACCCGCACCAGATGCACCTGCACCT<br>G G P A P D A P A P                                                             | 2.2      | 73         | 15, 32.5, 57 (spans<br>this and previous<br>repeats) |
|         | Aa1     | GCACCAGGTGGACCTCCATCGGATACACCT<br>A P G G P P S D T P                                                             | 2.5      | 86         | 15, 3.5, 67<br>15, 5.3, 67                           |
|         | Aa1     | CTTATACCGAGACGA<br>L I P R R                                                                                      | 4.9      | 90         |                                                      |
|         | Aa1     | CCTACACCGAGTGGG<br>P T P S G                                                                                      | 2.9      | 80         |                                                      |
|         | Aa1     | CCTACACCAGATGGACCTCCATCGGATGCA<br>P T P D G P P S D A                                                             | 2.5      | 96         | 15, 16.8, 72                                         |
|         | Aa1     | GGACTTATACCGAGAAGACTTATACCGAAA<br>G L I P R R L I P K                                                             | 2.5      | 84         | 15, 4.9, 81                                          |
|         | Aa1     | GCACCAGATGGACCTTACCGGGTGGAGAT<br>A P D G P L P G G D                                                              | 3.4      | 63         |                                                      |
|         | Aa1     | CCTACACCAGGTGGACCTCCATCAGATGCA<br>P T P G G P P S D A                                                             | 2.5      | 80         | 15, 6.4, 68                                          |
|         | Aa1     | GGACTTATACCGAGA<br>G L I P R                                                                                      | 5        | 86         |                                                      |
|         | Aa1     | AGTGGACCCGCACCGGATGGACCTTACCTGGTGGAGATGC<br>AATG<br>S G P A P D G P S P G G D A                                   | 1.9      | 81         | 15, 5.2, 68                                          |



| Repeat* | Species | Sequence <sup>†</sup>                                                                                                                                                | Copy no. | % Identity | Overlapping repeats <sup>‡</sup>                                                            |
|---------|---------|----------------------------------------------------------------------------------------------------------------------------------------------------------------------|----------|------------|---------------------------------------------------------------------------------------------|
|         |         | M                                                                                                                                                                    |          |            |                                                                                             |
|         | Aa1     | CTTATACCGAGACGA<br>L I P R R                                                                                                                                         | 5        | 81         |                                                                                             |
|         | Aa1     | GCACGAGTGGACCTTCACCTGGTGGACAT<br>A Q S G P S P G G H                                                                                                                 | 2.8      | 72         | 15, 6.6, 74                                                                                 |
|         | Aa2     | CCAGGTGAAGATGCATCAAATGGAGCTTTACCAAGTGAAGA<br>TACAACGAGTGCAGCTACA<br>P G E D A S N G A L P S E D<br><br>T T S A A T                                                   | 2.3      | 80         | 30, 4.9, 69<br>15, 10.4, 61                                                                 |
|         | Aa2     | CCACCGGATGCATCTGCACCGGATAGATCT<br>P P D A S A P D R S                                                                                                                | 4.5      | 76         | 15, 9, 75<br>45, 2.9, 73                                                                    |
|         | Aa2     | CCTGCACCGGGTGGACCTCCATCAGATGCA<br>P A P G G P P S D A                                                                                                                | 4.5      | 83         | 15, 47.3, 56 (spans<br>this and the next<br>repeat)                                         |
|         | Aa2     | CCAGGTGGACCTATA<br>P G G P I                                                                                                                                         | 32.7     | 61         | 15, 6, 78<br>15, 6.3, 76                                                                    |
|         | Aa2     | GGTGGACTTACATTAGGTGGACCTAAAACA<br>G G L T L G G P K T                                                                                                                | 3.8      | 73         | 15, 6.3, 72                                                                                 |
|         | Aa2     | GGACTTATACCAAGA<br>G L I P R                                                                                                                                         | 4        | 84         |                                                                                             |
|         | Aa2     | CCTGCACCGGGTGGGA<br>P A P G G                                                                                                                                        | 17       | 62         |                                                                                             |
|         | Aa2     | GGACTTATACCGAGA<br>G L I P R                                                                                                                                         | 8        | 92         |                                                                                             |
|         | Aa2     | GCACCGAGTGGACCC<br>A P S G P                                                                                                                                         | 2.7      | 100        |                                                                                             |
|         | Aa2     | AGTGGACCCGCACCGAGTGGGACTTCACTGGATGAAGATGC<br>AATG<br>S G P A P S G T S L D E D A<br><br>M                                                                            | 1.9      | 75         |                                                                                             |
|         | Aa2     | GGACTTATACCGAGA<br>G L I P R                                                                                                                                         | 4        | 91         |                                                                                             |
|         | Op      | GGAGATGCATCAGGGGGAGGTGCACCAGTCGGAGATGCATC<br>AGGGGGAGGTGCACCGTTGGAGATGCATCAGGGGGAGGTTT<br>GCCGTTT<br>G D A S G G G A P V G D A S<br>G G G A P L E M H Q G E V<br>C R | 21.3     | 71         | 30, 58.1, 77<br>15, 11.6, 63<br>15, 14.7, 64<br>15, 13.3, 71<br>60, 32.4, 72<br>30, 7.3, 85 |
|         | Op      | GGAGATGCATCGGGTGGAGCTGCACCGATT<br>G D A S G G A A P I                                                                                                                | 3.4      | 70         | 15, 3.1, 67                                                                                 |

| Repeat*             | Species | Sequence†                                                                                       | Copy no. | % Identity | Overlapping repeats‡                         |
|---------------------|---------|-------------------------------------------------------------------------------------------------|----------|------------|----------------------------------------------|
|                     | Cr      | CCGATTGGAGACACACCGGTTGGAGACACATCGGGTGGAGC<br>CGCACCA<br>P I G D T P V G D T S G G A<br><br>A P  | 2        | 82         | 15, 6.8, 67<br>30, 2.1, 84                   |
| II                  | At      | CCATCATCTAAACCGACATCTAAA<br>P S S K P T S K                                                     | 19.1     | 77         | 12, 37.4, 68                                 |
|                     | Aa1     | CCATCATCAAAAACCGACAGCAAAA<br>P S S K P T A K                                                    | 48       | 65         | 12, 43.4, 65<br>48, 9.4, 73<br>36, 19.0, 66  |
|                     | Aa2     | CCGACATCAAAAACCGACAACAAAA<br>P T S K P T T K                                                    | 48.7     | 69         | 12, 38, 70<br>24, 24.3, 71<br>36, 31.5, 67   |
|                     | Op      | AAACCAACAAC<br>K P T T                                                                          | 33.8     | 65         |                                              |
|                     | Op      | AAACGACAGCAAAAACCGACAGCAAAAACCGACAGTAAACCG<br>GCAGCTA<br>K T T A K P T A K P T V K P<br><br>A A | 18.1     | 70         | 24, 36.3, 71<br>12, 63.3, 69<br>12, 86.9, 60 |
|                     | Op      | CCGGCTAAACCGTAACCTAAA<br>P A K P V T K                                                          | 2        | 85         |                                              |
|                     | Cr      | AACCGACATCAAAAACCAACATCTAAACCGAAAACCTA<br>P T S K P T S K P K T K                               | 2.9      | 69         | 12, 8.5, 70                                  |
| <b>GRP22 (7600)</b> |         |                                                                                                 |          |            |                                              |
| I                   | At      | GCTGGT<br>A G                                                                                   | 20.2     | 77         | 3, 41.7, 66                                  |
|                     | Aa1     | GCAGGTGCAAGTACACCT<br>A G A M T P                                                               | 4.1      | 67         |                                              |
|                     | Aa2     | GCTGGT<br>A G                                                                                   | 16.2     | 82         |                                              |
|                     | Cr      | GCACCCGACGCAAGTACACCC<br>A P A A S T P                                                          | 3.2      | 75         | 15, 5.4, 68                                  |

As in Table 3, repeated sequences, numbered (\*) were categorized by length and sequence content and are grouped in order of occurrence in each gene; species are abbreviated as in Fig. 2. Consensus repeat sequences (†), adjusted to begin at the first position of a codon and to maintain periodicity between species; nucleotide sequence (upper row); protein sequence (lower row). Sequence length, copy number, and % identity are shown, respectively, for overlapping, internal repeats (‡).
