# Supplementary material
Source: PubMed Central journal article supplement (PMC365782)
Supplement: pnas_101_9_3286__5.pdf [file pnas_101_9_3286__5.pdf]

**Table 5.  $K_a$ ,  $K_s$ , and  $K_a/K_s$  values for all pairwise comparisons**

| Gene                  | Comparison* |     | $K_a^\dagger$ | $K_s^\dagger$ | $K_a/K_s^\dagger$ | Average <sup>‡</sup> | SD <sup>‡</sup> |
|-----------------------|-------------|-----|---------------|---------------|-------------------|----------------------|-----------------|
| <b>Flanking genes</b> |             |     |               |               |                   |                      |                 |
| 7460                  |             |     |               |               |                   | 0.160                | 0.026           |
|                       | At          | Aa1 | 0.018         | 0.140         | 0.132             |                      |                 |
|                       | At          | Op  | 0.035         | 0.199         | 0.178             |                      |                 |
|                       | At          | Bo  | 0.078         | 0.409         | 0.192             |                      |                 |
|                       | Aa1         | Op  | 0.031         | 0.228         | 0.135             |                      |                 |
|                       | Aa1         | Bo  | 0.078         | 0.437         | 0.179             |                      |                 |
|                       | Bo          | Op  | 0.068         | 0.476         | 0.142             |                      |                 |
| 7470                  |             |     |               |               |                   | 0.171                | 0.040           |
|                       | At          | Aa1 | 0.027         | 0.186         | 0.143             |                      |                 |
|                       | At          | Op  | 0.036         | 0.327         | 0.111             |                      |                 |
|                       | At          | Cr  | 0.059         | 0.252         | 0.232             |                      |                 |
|                       | At          | Bo  | 0.082         | 0.510         | 0.160             |                      |                 |
|                       | Aa1         | Op  | 0.029         | 0.223         | 0.130             |                      |                 |
|                       | Aa1         | Cr  | 0.049         | 0.227         | 0.217             |                      |                 |
|                       | Aa1         | Bo  | 0.081         | 0.484         | 0.168             |                      |                 |
|                       | Cr          | Op  | 0.040         | 0.257         | 0.155             |                      |                 |
|                       | Cr          | Bo  | 0.104         | 0.471         | 0.220             |                      |                 |
|                       | Op          | Bo  | 0.089         | 0.507         | 0.176             |                      |                 |
| 7475                  |             |     |               |               |                   | 0.399                | 0.190           |
|                       | At          | Aa1 | 0.027         | 0.041         | 0.652             |                      |                 |
|                       | At          | Op  | 0.037         | 0.126         | 0.295             |                      |                 |
|                       | At          | Cr  | 0.070         | 0.105         | 0.665             |                      |                 |
|                       | At          | Sio | 0.085         | 0.164         | 0.518             |                      |                 |
|                       | At          | Bo  | 0.092         | 0.137         | 0.672             |                      |                 |
|                       | Aa1         | Op  | 0.010         | 0.125         | 0.076             |                      |                 |
|                       | Aa1         | Cr  | 0.047         | 0.105         | 0.449             |                      |                 |
|                       | Aa1         | Sio | 0.055         | 0.162         | 0.341             |                      |                 |
|                       | Aa1         | Bo  | 0.062         | 0.159         | 0.389             |                      |                 |
|                       | Op          | Cr  | 0.037         | 0.266         | 0.140             |                      |                 |
|                       | Op          | Sio | 0.045         | 0.197         | 0.229             |                      |                 |
|                       | Op          | Bo  | 0.052         | 0.197         | 0.263             |                      |                 |
|                       | Cr          | Sio | 0.085         | 0.302         | 0.282             |                      |                 |

| Gene | Comparison* |     | $K_a^\dagger$ | $K_s^\dagger$ | $K_a/K_s^\dagger$ | Average <sup>‡</sup> | SD <sup>‡</sup> |
|------|-------------|-----|---------------|---------------|-------------------|----------------------|-----------------|
|      | Cr          | Bo  | 0.092         | 0.216         | 0.425             |                      |                 |
|      | Sio         | Bo  | 0.062         | 0.107         | 0.583             |                      |                 |
| 7480 |             |     |               |               |                   | 0.201                | 0.035           |
|      | At          | Aa1 | 0.029         | 0.134         | 0.213             |                      |                 |
|      | At          | Op  | 0.042         | 0.188         | 0.225             |                      |                 |
|      | At          | Cr  | 0.034         | 0.244         | 0.141             |                      |                 |
|      | At          | Sio | 0.080         | 0.363         | 0.221             |                      |                 |
|      | At          | Bo  | 0.075         | 0.397         | 0.188             |                      |                 |
|      | Aa1         | Op  | 0.039         | 0.155         | 0.253             |                      |                 |
|      | Aa1         | Cr  | 0.031         | 0.215         | 0.145             |                      |                 |
|      | Aa1         | Sio | 0.079         | 0.310         | 0.256             |                      |                 |
|      | Aa1         | Bo  | 0.076         | 0.358         | 0.212             |                      |                 |
|      | Op          | Cr  | 0.036         | 0.214         | 0.167             |                      |                 |
|      | Op          | Sio | 0.081         | 0.347         | 0.232             |                      |                 |
|      | Op          | Bo  | 0.074         | 0.382         | 0.193             |                      |                 |
|      | Cr          | Sio | 0.073         | 0.391         | 0.186             |                      |                 |
|      | Cr          | Bo  | 0.073         | 0.422         | 0.173             |                      |                 |
|      | Sio         | Bo  | 0.042         | 0.198         | 0.214             |                      |                 |
| 7490 |             |     |               |               |                   | 0.331                | 0.229           |
|      | At          | Aa1 | 0.024         | 0.031         | 0.748             |                      |                 |
|      | At          | Op  | 0.067         | 0.159         | 0.421             |                      |                 |
|      | At          | Sio | 0.071         | 0.401         | 0.178             |                      |                 |
|      | Aa1         | Op  | 0.056         | 0.184         | 0.302             |                      |                 |
|      | Aa1         | Sio | 0.054         | 0.397         | 0.135             |                      |                 |
|      | Op          | Sio | 0.072         | 0.360         | 0.200             |                      |                 |
| 7500 |             |     |               |               |                   | 0.160                | 0.041           |
|      | At          | Aa1 | 0.014         | 0.130         | 0.109             |                      |                 |
|      | At          | Aa6 | 0.012         | 0.125         | 0.094             |                      |                 |
|      | At          | Op  | 0.052         | 0.283         | 0.185             |                      |                 |
|      | At          | Cr  | 0.040         | 0.323         | 0.125             |                      |                 |
|      | At          | Sio | 0.063         | 0.333         | 0.190             |                      |                 |
|      | At          | Bo  | 0.088         | 0.435         | 0.201             |                      |                 |
|      | Aa1         | Aa6 | 0.006         | 0.062         | 0.093             |                      |                 |
|      | Aa1         | Op  | 0.044         | 0.287         | 0.153             |                      |                 |
|      | Aa1         | Cr  | 0.030         | 0.334         | 0.090             |                      |                 |

| Gene | Comparison* |     | $K_a^\dagger$ | $K_s^\dagger$ | $K_a/K_s^\dagger$ | Average <sup>‡</sup> | SD <sup>‡</sup> |
|------|-------------|-----|---------------|---------------|-------------------|----------------------|-----------------|
|      | Aa1         | Sio | 0.053         | 0.279         | 0.188             |                      |                 |
|      | Aa1         | Bo  | 0.077         | 0.433         | 0.177             |                      |                 |
|      | Aa6         | Op  | 0.046         | 0.252         | 0.181             |                      |                 |
|      | Aa6         | Cr  | 0.032         | 0.291         | 0.109             |                      |                 |
|      | Aa6         | Sio | 0.052         | 0.246         | 0.213             |                      |                 |
|      | Aa6         | Bo  | 0.076         | 0.386         | 0.197             |                      |                 |
|      | Op          | Cr  | 0.037         | 0.270         | 0.137             |                      |                 |
|      | Op          | Sio | 0.068         | 0.361         | 0.188             |                      |                 |
|      | Op          | Bo  | 0.090         | 0.440         | 0.204             |                      |                 |
|      | Cr          | Sio | 0.068         | 0.415         | 0.163             |                      |                 |
|      | Cr          | Bo  | 0.090         | 0.511         | 0.175             |                      |                 |
|      | Sio         | Bo  | 0.038         | 0.208         | 0.181             |                      |                 |
| 7580 |             |     |               |               |                   | 0.143                | 0.039           |
|      | At          | Aa1 | 0.015         | 0.139         | 0.106             |                      |                 |
|      | At          | Aa6 | 0.018         | 0.145         | 0.122             |                      |                 |
|      | At          | Cr  | 0.040         | 0.249         | 0.162             |                      |                 |
|      | At          | Op  | 0.029         | 0.219         | 0.132             |                      |                 |
|      | At          | Sio | 0.057         | 0.416         | 0.137             |                      |                 |
|      | At          | Bo  | 0.074         | 0.370         | 0.199             |                      |                 |
|      | Aa1         | Aa6 | 0.007         | 0.059         | 0.120             |                      |                 |
|      | Aa1         | Cr  | 0.036         | 0.240         | 0.150             |                      |                 |
|      | Aa1         | Op  | 0.018         | 0.232         | 0.078             |                      |                 |
|      | Aa1         | Sio | 0.053         | 0.429         | 0.124             |                      |                 |
|      | Aa1         | Bo  | 0.072         | 0.327         | 0.219             |                      |                 |
|      | Aa6         | Op  | 0.021         | 0.222         | 0.095             |                      |                 |
|      | Aa6         | Cr  | 0.039         | 0.257         | 0.153             |                      |                 |
|      | Aa6         | Sio | 0.054         | 0.448         | 0.120             |                      |                 |
|      | Aa6         | Bo  | 0.075         | 0.345         | 0.217             |                      |                 |
|      | Op          | Cr  | 0.032         | 0.228         | 0.142             |                      |                 |
|      | Op          | Sio | 0.053         | 0.503         | 0.106             |                      |                 |
|      | Op          | Bo  | 0.062         | 0.391         | 0.158             |                      |                 |
|      | Cr          | Sio | 0.060         | 0.517         | 0.116             |                      |                 |
|      | Cr          | Bo  | 0.072         | 0.468         | 0.153             |                      |                 |
|      | Sio         | Bo  | 0.042         | 0.212         | 0.198             |                      |                 |
| 7590 |             |     |               |               |                   | 0.030                | 0.013           |

| Gene | Comparison* |     | $K_a^\dagger$ | $K_s^\dagger$ | $K_a/K_s^\dagger$ | Average <sup>‡</sup> | SD <sup>‡</sup> |
|------|-------------|-----|---------------|---------------|-------------------|----------------------|-----------------|
|      | At          | Aa1 | 0.001         | 0.132         | 0.007             |                      |                 |
|      | At          | Aa6 | 0.002         | 0.106         | 0.019             |                      |                 |
|      | Cr          | At  | 0.004         | 0.206         | 0.018             |                      |                 |
|      | Sio         | At  | 0.009         | 0.353         | 0.027             |                      |                 |
|      | Bo          | At  | 0.016         | 0.369         | 0.042             |                      |                 |
|      | Aa1         | Aa6 | 0.001         | 0.076         | 0.015             |                      |                 |
|      | Cr          | Aa1 | 0.004         | 0.190         | 0.021             |                      |                 |
|      | Sio         | Aa1 | 0.009         | 0.341         | 0.025             |                      |                 |
|      | Bo          | Aa1 | 0.015         | 0.343         | 0.043             |                      |                 |
|      | Cr          | Aa6 | 0.005         | 0.182         | 0.028             |                      |                 |
|      | Sio         | Aa6 | 0.010         | 0.336         | 0.029             |                      |                 |
|      | Bo          | Aa6 | 0.016         | 0.346         | 0.046             |                      |                 |
|      | Bo          | Cr  | 0.019         | 0.354         | 0.052             |                      |                 |
|      | Sio         | Cr  | 0.012         | 0.355         | 0.035             |                      |                 |
|      | Sio         | Bo  | 0.010         | 0.264         | 0.039             |                      |                 |
| 7610 |             |     |               |               |                   | 0.379                | 0.080           |
|      | At          | Aa1 | 0.042         | 0.171         | 0.247             |                      |                 |
|      | Aa6         | At  | 0.046         | 0.150         | 0.306             |                      |                 |
|      | At          | Cr  | 0.116         | 0.265         | 0.437             |                      |                 |
|      | At          | Sio | 0.186         | 0.404         | 0.459             |                      |                 |
|      | Aa1         | Aa6 | 0.013         | 0.050         | 0.262             |                      |                 |
|      | Aa1         | Cr  | 0.098         | 0.259         | 0.380             |                      |                 |
|      | Aa1         | Sio | 0.164         | 0.400         | 0.410             |                      |                 |
|      | Aa6         | Cr  | 0.098         | 0.244         | 0.403             |                      |                 |
|      | Aa6         | Sio | 0.163         | 0.398         | 0.410             |                      |                 |
|      | Cr          | Sio | 0.194         | 0.412         | 0.472             |                      |                 |
| 7620 |             |     |               |               |                   | 0.218                | 0.053           |
|      | At          | Aa1 | 0.020         | 0.115         | 0.174             |                      |                 |
|      | At          | Aa6 | 0.023         | 0.116         | 0.197             |                      |                 |
|      | At          | Cr  | 0.041         | 0.264         | 0.154             |                      |                 |
|      | At          | Sio | 0.072         | 0.378         | 0.190             |                      |                 |
|      | At          | Bo  | 0.105         | 0.397         | 0.264             |                      |                 |
|      | Aa1         | Aa6 | 0.009         | 0.044         | 0.209             |                      |                 |
|      | Aa1         | Cr  | 0.030         | 0.223         | 0.133             |                      |                 |
|      | Aa1         | Sio | 0.063         | 0.324         | 0.193             |                      |                 |

| Gene              | Comparison* |     | $K_a^\dagger$ | $K_s^\dagger$ | $K_a/K_s^\dagger$ | Average <sup>‡</sup> | SD <sup>‡</sup> |
|-------------------|-------------|-----|---------------|---------------|-------------------|----------------------|-----------------|
|                   | Aa1         | Bo  | 0.096         | 0.344         | 0.279             |                      |                 |
|                   | Aa6         | Cr  | 0.034         | 0.214         | 0.158             |                      |                 |
|                   | Aa6         | Sio | 0.066         | 0.307         | 0.216             |                      |                 |
|                   | Aa6         | Bo  | 0.097         | 0.331         | 0.294             |                      |                 |
|                   | Cr          | Sio | 0.079         | 0.345         | 0.229             |                      |                 |
|                   | Cr          | Bo  | 0.100         | 0.342         | 0.292             |                      |                 |
|                   | Sio         | Bo  | 0.080         | 0.286         | 0.280             |                      |                 |
| 7630              |             |     |               |               |                   | 0.285                | 0.045           |
|                   | At          | Cr  | 0.055         | 0.227         | 0.243             |                      |                 |
|                   | At          | Aa1 | 0.048         | 0.149         | 0.321             |                      |                 |
|                   | At          | Aa6 | 0.050         | 0.153         | 0.323             |                      |                 |
|                   | At          | Sio | 0.081         | 0.276         | 0.294             |                      |                 |
|                   | At          | Bo  | 0.110         | 0.362         | 0.305             |                      |                 |
|                   | Aa1         | Aa6 | 0.002         | 0.009         | 0.160             |                      |                 |
|                   | Aa1         | Cr  | 0.058         | 0.166         | 0.349             |                      |                 |
|                   | Aa1         | Sio | 0.073         | 0.246         | 0.298             |                      |                 |
|                   | Aa1         | Bo  | 0.103         | 0.371         | 0.276             |                      |                 |
|                   | Aa6         | Cr  | 0.060         | 0.178         | 0.334             |                      |                 |
|                   | Aa6         | Sio | 0.075         | 0.260         | 0.289             |                      |                 |
|                   | Aa6         | Bo  | 0.104         | 0.388         | 0.269             |                      |                 |
|                   | Cr          | Sio | 0.074         | 0.281         | 0.263             |                      |                 |
|                   | Cr          | Bo  | 0.096         | 0.356         | 0.269             |                      |                 |
|                   | Sio         | Bo  | 0.076         | 0.264         | 0.286             |                      |                 |
| <b>GRP exon 1</b> |             |     |               |               |                   |                      |                 |
| 7510              |             |     |               |               |                   | 0.515                | 0.154           |
|                   | At          | Aa1 | 0.014         | 0.049         | 0.278             |                      |                 |
|                   | At          | Aa6 | 0.014         | 0.049         | 0.278             |                      |                 |
|                   | At          | Op  | 0.078         | 0.181         | 0.429             |                      |                 |
|                   | At          | Sio | 0.272         | 0.391         | 0.695             |                      |                 |
|                   | At          | Bo  | 0.232         | 0.454         | 0.511             |                      |                 |
|                   | Aa1         | Aa6 | 0.000         | 0.000         |                   |                      |                 |
|                   | Aa1         | Op  | 0.078         | 0.205         | 0.379             |                      |                 |
|                   | Aa1         | Sio | 0.293         | 0.422         | 0.695             |                      |                 |
|                   | Aa1         | Bo  | 0.242         | 0.456         | 0.530             |                      |                 |
|                   | Aa6         | Op  | 0.078         | 0.205         | 0.379             |                      |                 |

| Gene | Comparison* |     | $K_a^\dagger$ | $K_s^\dagger$ | $K_a/K_s^\dagger$ | Average <sup>‡</sup> | SD <sup>‡</sup> |
|------|-------------|-----|---------------|---------------|-------------------|----------------------|-----------------|
|      | Aa6         | Sio | 0.293         | 0.422         | 0.695             |                      |                 |
|      | Aa6         | Bo  | 0.242         | 0.456         | 0.530             |                      |                 |
|      | Op          | Sio | 0.269         | 0.444         | 0.607             |                      |                 |
|      | Op          | Bo  | 0.209         | 0.437         | 0.478             |                      |                 |
|      | Bo          | Sio | 0.151         | 0.208         | 0.725             |                      |                 |
| 7520 |             |     |               |               |                   | 0.452                | 0.250           |
|      | Aa1         | At  | 0.043         | 0.124         | 0.349             |                      |                 |
|      | Aa6         | At  | 0.109         | 0.182         | 0.599             |                      |                 |
|      | At          | Cr  | 0.083         | 0.614         | 0.135             |                      |                 |
|      | At          | Op  | 0.080         | 0.321         | 0.250             |                      |                 |
|      | At          | Sio | 0.234         | 0.597         | 0.393             |                      |                 |
|      | At          | Bo  | 0.312         | 0.568         | 0.549             |                      |                 |
|      | Aa1         | Aa6 | 0.062         | 0.048         | 1.283             |                      |                 |
|      | Aa1         | Cr  | 0.062         | 0.453         | 0.137             |                      |                 |
|      | Aa1         | Op  | 0.059         | 0.231         | 0.257             |                      |                 |
|      | Aa1         | Sio | 0.244         | 0.478         | 0.511             |                      |                 |
|      | Aa1         | Bo  | 0.323         | 0.510         | 0.633             |                      |                 |
|      | Aa6         | Cr  | 0.129         | 0.492         | 0.263             |                      |                 |
|      | Aa6         | Op  | 0.127         | 0.261         | 0.485             |                      |                 |
|      | Aa6         | Sio | 0.285         | 0.548         | 0.519             |                      |                 |
|      | Aa6         | Bo  | 0.367         | 0.521         | 0.705             |                      |                 |
|      | Cr          | Op  | 0.059         | 0.252         | 0.234             |                      |                 |
|      | Cr          | Sio | 0.222         | 0.616         | 0.360             |                      |                 |
|      | Cr          | Bo  | 0.268         | 0.617         | 0.434             |                      |                 |
|      | Op          | Sio | 0.241         | 0.511         | 0.472             |                      |                 |
|      | Op          | Bo  | 0.285         | 0.475         | 0.600             |                      |                 |
|      | Sio         | Bo  | 0.092         | 0.277         | 0.331             |                      |                 |
| 7530 |             |     |               |               |                   | 0.428                | 0.177           |
|      | At          | Aa1 | 0.049         | 0.223         | 0.220             |                      |                 |
|      | At          | Cr  | 0.085         | 0.359         | 0.237             |                      |                 |
|      | At          | Op  | 0.047         | 0.338         | 0.138             |                      |                 |
|      | At          | Sio | 0.207         | 0.678         | 0.305             |                      |                 |
|      | At          | Bo  | 0.403         | 0.634         | 0.636             |                      |                 |
|      | Aa1         | Op  | 0.033         | 0.160         | 0.208             |                      |                 |
|      | Aa1         | Cr  | 0.074         | 0.168         | 0.439             |                      |                 |

| Gene | Comparison* |     | $K_a^\dagger$ | $K_s^\dagger$ | $K_a/K_s^\dagger$ | Average <sup>‡</sup> | SD <sup>‡</sup> |
|------|-------------|-----|---------------|---------------|-------------------|----------------------|-----------------|
|      | Aa1         | Sio | 0.176         | 0.468         | 0.376             |                      |                 |
|      | Aa1         | Bo  | 0.367         | 0.634         | 0.580             |                      |                 |
|      | Cr          | Op  | 0.098         | 0.178         | 0.551             |                      |                 |
|      | Cr          | Sio | 0.191         | 0.467         | 0.408             |                      |                 |
|      | Cr          | Bo  | 0.378         | 0.654         | 0.578             |                      |                 |
|      | Op          | Bo  | 0.373         | 0.556         | 0.671             |                      |                 |
|      | Op          | Sio | 0.186         | 0.422         | 0.441             |                      |                 |
|      | Sio         | Bo  | 0.281         | 0.441         | 0.637             |                      |                 |
| 7540 |             |     |               |               |                   | 0.591                | 0.138           |
|      | At          | Aa1 | 0.052         | 0.059         | 0.881             |                      |                 |
|      | At          | Aa6 | 0.052         | 0.059         | 0.881             |                      |                 |
|      | At          | Op  | 0.113         | 0.216         | 0.523             |                      |                 |
|      | At          | Cr  | 0.141         | 0.283         | 0.500             |                      |                 |
|      | At          | Sio | 0.295         | 0.619         | 0.476             |                      |                 |
|      | At          | Bo  | 0.294         | 0.750         | 0.391             |                      |                 |
|      | Aa1         | Aa6 | 0.000         | 0.000         |                   |                      |                 |
|      | Aa1         | Op  | 0.128         | 0.171         | 0.747             |                      |                 |
|      | Aa1         | Cr  | 0.143         | 0.235         | 0.611             |                      |                 |
|      | Aa1         | Sio | 0.318         | 0.527         | 0.603             |                      |                 |
|      | Aa1         | Bo  | 0.327         | 0.656         | 0.499             |                      |                 |
|      | Aa6         | Cr  | 0.143         | 0.235         | 0.611             |                      |                 |
|      | Aa6         | Op  | 0.128         | 0.171         | 0.747             |                      |                 |
|      | Aa6         | Sio | 0.318         | 0.527         | 0.603             |                      |                 |
|      | Aa6         | Bo  | 0.327         | 0.656         | 0.499             |                      |                 |
|      | Op          | Cr  | 0.152         | 0.243         | 0.626             |                      |                 |
|      | Op          | Sio | 0.293         | 0.524         | 0.560             |                      |                 |
|      | Op          | Bo  | 0.295         | 0.636         | 0.464             |                      |                 |
|      | Cr          | Sio | 0.359         | 0.526         | 0.682             |                      |                 |
|      | Cr          | Bo  | 0.343         | 0.765         | 0.448             |                      |                 |
|      | Sio         | Bo  | 0.105         | 0.225         | 0.467             |                      |                 |
| 7550 |             |     |               |               |                   | 0.487                | 0.229           |
|      | At          | Aa1 | 0.061         | 0.059         | 1.041             |                      |                 |
|      | At          | Aa6 | 0.061         | 0.075         | 0.814             |                      |                 |
|      | At          | Op  | 0.062         | 0.148         | 0.415             |                      |                 |
|      | At          | Cr  | 0.069         | 0.110         | 0.623             |                      |                 |

| Gene | Comparison* |       | $K_a^\dagger$ | $K_s^\dagger$ | $K_a/K_s^\dagger$ | Average <sup>‡</sup> | SD <sup>‡</sup> |
|------|-------------|-------|---------------|---------------|-------------------|----------------------|-----------------|
|      | At          | Sio50 | 0.124         | 0.342         | 0.362             |                      |                 |
|      | At          | Sio55 | 0.138         | 0.508         | 0.272             |                      |                 |
|      | At          | Bo    | 0.250         | 0.532         | 0.469             |                      |                 |
|      | Aa1         | Aa6   | 0.000         | 0.014         |                   |                      |                 |
|      | Aa1         | Op    | 0.055         | 0.165         | 0.336             |                      |                 |
|      | Aa1         | Cr    | 0.068         | 0.078         | 0.870             |                      |                 |
|      | Aa1         | Sio50 | 0.146         | 0.315         | 0.464             |                      |                 |
|      | Aa1         | Sio55 | 0.153         | 0.522         | 0.293             |                      |                 |
|      | Aa1         | Bo    | 0.268         | 0.533         | 0.504             |                      |                 |
|      | Aa6         | Op    | 0.055         | 0.148         | 0.375             |                      |                 |
|      | Aa6         | Cr    | 0.068         | 0.078         | 0.870             |                      |                 |
|      | Aa6         | Sio50 | 0.146         | 0.292         | 0.501             |                      |                 |
|      | Aa6         | Sio55 | 0.153         | 0.487         | 0.314             |                      |                 |
|      | Aa6         | Bo    | 0.268         | 0.497         | 0.540             |                      |                 |
|      | Op          | Cr    | 0.069         | 0.165         | 0.414             |                      |                 |
|      | Op          | Sio50 | 0.103         | 0.395         | 0.260             |                      |                 |
|      | Op          | Sio55 | 0.108         | 0.562         | 0.192             |                      |                 |
|      | Op          | Bo    | 0.241         | 0.658         | 0.366             |                      |                 |
|      | Cr          | Sio50 | 0.106         | 0.307         | 0.345             |                      |                 |
|      | Cr          | Sio55 | 0.105         | 0.463         | 0.227             |                      |                 |
|      | Cr          | Bo    | 0.245         | 0.470         | 0.521             |                      |                 |
|      | Sio50       | Sio55 | 0.061         | 0.239         | 0.253             |                      |                 |
|      | Sio50       | Bo    | 0.192         | 0.301         | 0.639             |                      |                 |
|      | Sio55       | Bo    | 0.184         | 0.212         | 0.867             |                      |                 |
| 7560 |             |       |               |               |                   | 0.483                | 0.098           |
|      | At          | Aa1   | 0.054         | 0.119         | 0.454             |                      |                 |
|      | At          | Aa6   | 0.064         | 0.089         | 0.720             |                      |                 |
|      | At          | Op    | 0.143         | 0.291         | 0.490             |                      |                 |
|      | At          | Cr    | 0.201         | 0.413         | 0.487             |                      |                 |
|      | At          | Sio   | 0.220         | 0.594         | 0.371             |                      |                 |
|      | Aa1         | Aa6   | 0.019         | 0.058         | 0.321             |                      |                 |
|      | Aa1         | Op    | 0.126         | 0.271         | 0.464             |                      |                 |
|      | Aa1         | Cr    | 0.192         | 0.400         | 0.481             |                      |                 |
|      | Aa1         | Sio   | 0.223         | 0.565         | 0.394             |                      |                 |
|      | Aa6         | Op    | 0.148         | 0.234         | 0.632             |                      |                 |



| Gene              | Comparison* |     | $K_a^\dagger$          | $K_s^\dagger$ | $K_a/K_s^\dagger$ | Average <sup>‡</sup>             | SD <sup>‡</sup>                |                                |         |
|-------------------|-------------|-----|------------------------|---------------|-------------------|----------------------------------|--------------------------------|--------------------------------|---------|
|                   | Aa6         | Cr  | 0.198                  | 0.362         | 0.547             |                                  |                                |                                |         |
|                   | Aa6         | Sio | 0.248                  | 0.482         | 0.515             |                                  |                                |                                |         |
|                   | Op          | Cr  | 0.135                  | 0.291         | 0.465             |                                  |                                |                                |         |
|                   | Op          | Sio | 0.212                  | 0.446         | 0.476             |                                  |                                |                                |         |
|                   | Cr          | Sio | 0.242                  | 0.564         | 0.429             |                                  |                                |                                |         |
| 7565              |             |     |                        |               |                   | 0.476                            | 0.204                          |                                |         |
|                   | At          | Aa1 | 0.069                  | 0.131         | 0.524             |                                  |                                |                                |         |
|                   | At          | Aa6 | 0.059                  | 0.130         | 0.450             |                                  |                                |                                |         |
|                   | At          | Op  | 0.131                  | 0.195         | 0.673             |                                  |                                |                                |         |
|                   | At          | Cr  | 0.114                  | 0.375         | 0.304             |                                  |                                |                                |         |
|                   | Aa1         | Aa6 | 0.010                  | 0.032         | 0.302             |                                  |                                |                                |         |
|                   | Aa1         | Op  | 0.113                  | 0.125         | 0.901             |                                  |                                |                                |         |
|                   | Aa1         | Cr  | 0.110                  | 0.337         | 0.325             |                                  |                                |                                |         |
|                   | Aa6         | Op  | 0.102                  | 0.162         | 0.631             |                                  |                                |                                |         |
|                   | Aa6         | Cr  | 0.099                  | 0.335         | 0.295             |                                  |                                |                                |         |
|                   | Op          | Cr  | 0.122                  | 0.345         | 0.354             |                                  |                                |                                |         |
| 7600              |             |     |                        |               |                   | 0.597                            | 0.092                          |                                |         |
|                   | At          | Aa1 | 0.049                  | 0.097         | 0.505             |                                  |                                |                                |         |
|                   | At          | Aa6 | 0.048                  | 0.096         | 0.502             |                                  |                                |                                |         |
|                   | Cr          | At  | 0.170                  | 0.281         | 0.602             |                                  |                                |                                |         |
|                   | Aa6         | Aa1 | 0.024                  | 0.000         |                   |                                  |                                |                                |         |
|                   | Cr          | Aa1 | 0.140                  | 0.204         | 0.686             |                                  |                                |                                |         |
|                   | Cr          | Aa6 | 0.140                  | 0.203         | 0.689             |                                  |                                |                                |         |
| <b>GRP exon 2</b> |             |     |                        |               |                   |                                  |                                |                                |         |
|                   |             |     | Estimated <sup>†</sup> |               |                   | Simulated $K_a/K_s$ <sup>§</sup> |                                |                                |         |
|                   |             |     | $K_a$                  | $K_s$         | $K_a/K_s$         | 25 <sup>th</sup><br>percentile   | 50 <sup>th</sup><br>percentile | 75 <sup>th</sup><br>percentile | Average |
| 7510              | At          | Aa1 | 0.110                  | 0.157         | 0.699             | 0.536                            | 0.684                          | 0.900                          | 0.752   |
| 7520              | At          | Aa1 | 0.035                  | 0.107         | 0.325             | 0.253                            | 0.334                          | 0.472                          | 0.387   |
| 7530              | At          | Aa1 | 0.114                  | 0.078         | 1.458             | 1.235                            | 1.479                          | 1.810                          | 1.578   |
| 7540              | At          | Aa1 | 0.058                  | 0.107         | 0.540             | 0.383                            | 0.515                          | 0.699                          | 0.588   |
| 7550              | At          | Aa1 | 0.020                  | 0.124         | 0.163             | 0.000                            | 0.136                          | 0.330                          | 0.216   |
| 7560              | At          | Aa1 | 0.106                  | 0.523         | 0.204             | 0.141                            | 0.206                          | 0.302                          | 0.242   |
| 7565              | At          | Aa1 | 0.317                  | 0.201         | 1.581             | 1.475                            | 1.583                          | 1.699                          | 1.593   |
| 7600              | At          | Aa1 | 0.071                  | 0.262         | 0.271             | 0.205                            | 0.269                          | 0.342                          | 0.285   |

\*Species names abbreviated as in Fig 2.

†Values estimated with K-ESTIMATOR 6 (see *Methods*).

‡Average and standard deviation of  $K_a/K_s$  for all comparisons within a group.

§Values from Monte Carlo simulation with K-ESTIMATOR 6 (see *Methods*).
