# Supplementary material
Source: PubMed Central journal article supplement (PMC365782)

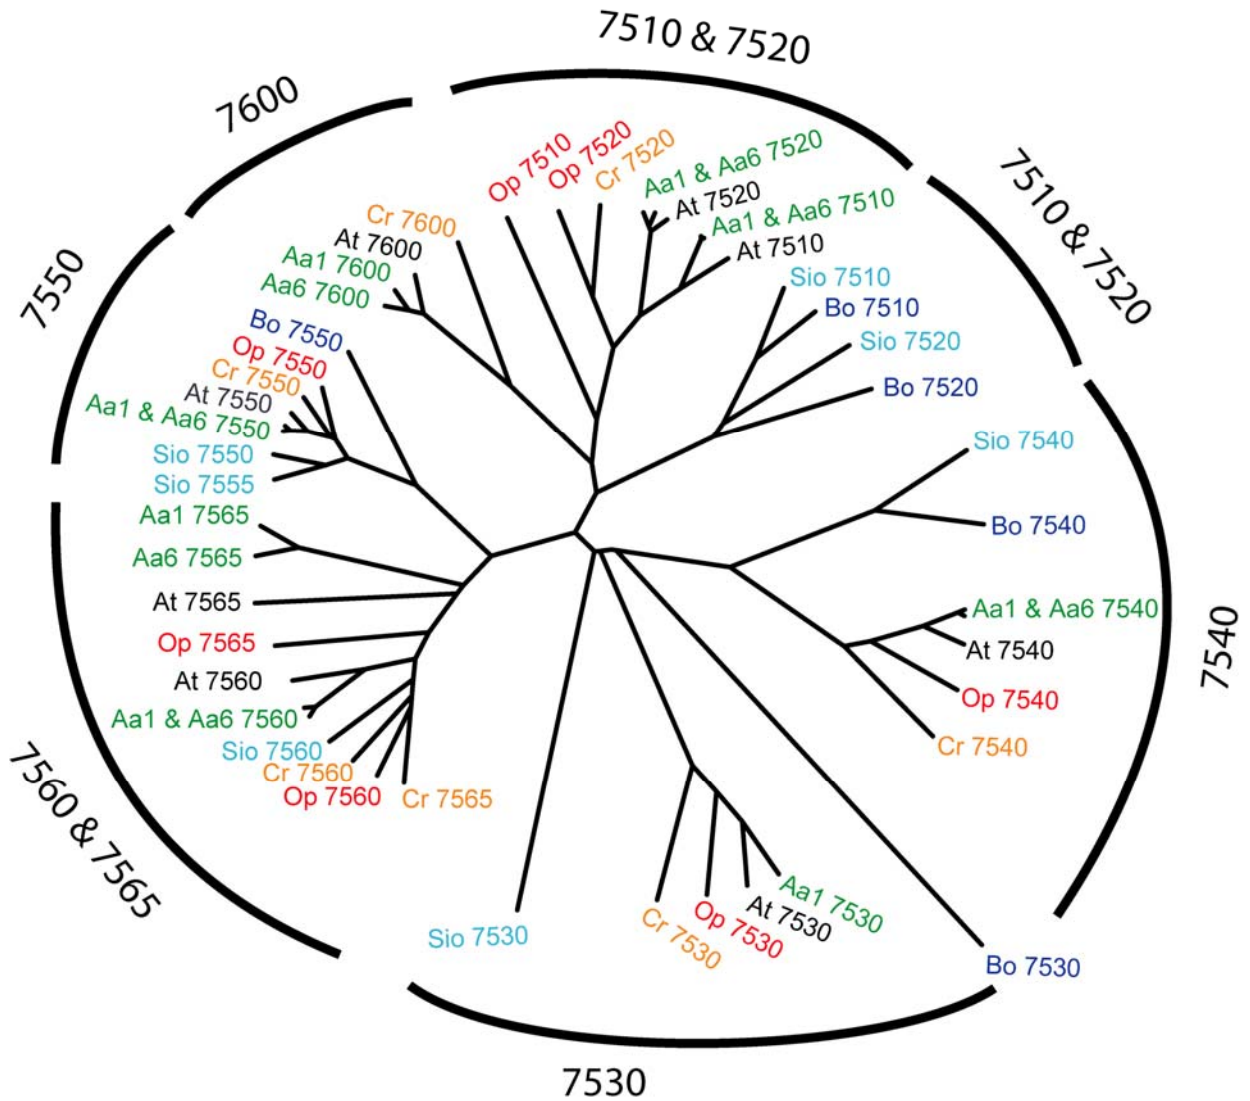

Supplement: pnas_101_9_3286__2.pdf [file pnas_101_9_3286__2.pdf]
